# A long non-coding RNA expression signature to predict survival of patients with colon adenocarcinoma

Weinan Xue<sup>1,\*</sup>, Jingwen Li<sup>1,\*</sup>, Fan Wang<sup>2,\*</sup>, Peng Han<sup>1</sup>, Yanlong Liu<sup>1</sup> and Binbin Cui<sup>1</sup>

<sup>1</sup>Department of Colorectal Surgery, The Affiliated Tumor Hospital of Harbin Medical University, Harbin, 150081, China

<sup>2</sup>Department of Epidemiology, School of Public Health, Harbin Medical University, Harbin, 150081, China

\*These authors contributed equally to this work

**Correspondence to:** Binbin Cui, **email:** binbincuihrb@126.com  
Yanlong Liu, **email:** yanlliu@yahoo.com

**Keywords:** biomarkers, colon adenocarcinoma, expression profiles, long non-coding RNA

**Received:** July 18, 2017

**Accepted:** August 27, 2017

**Published:** September 19, 2017

**Copyright:** Xue et al. This is an open-access article distributed under the terms of the Creative Commons Attribution License 3.0 (CC BY 3.0), which permits unrestricted use, distribution, and reproduction in any medium, provided the original author and source are credited.

## ABSTRACT

Colon cancer is the most common type of gastrointestinal cancer and is still the leading cause of cancer-related mortality worldwide. Long non-coding RNAs (lncRNAs) have been proved to be superior biomarkers in cancer diagnosis and prognosis than miRNAs and protein-coding genes. In the current study, our objective was to detect novel lncRNA biomarkers by analyzing lncRNA expression profiles and clinical data in a large cohort of patients with colon patients from The Cancer Genome Atlas (TCGA). By using Cox regression analysis, we identified two lncRNAs (*SNHG6* and *CTD-2354A18.1*) which could be independent prognostic factors for predicting clinical outcome in colon adenocarcinoma. Then a linear combination of these two lncRNA biomarkers (*SNHG6* and *CTD-2354A18.1*), termed two-lncRNA signature, was developed in the training set as a predictor for OS in patients with colon adenocarcinoma, and validated in the testing set and the entire patient set. This two-lncRNA signature demonstrated significant prognostic performance in both the testing set and the entire patient set which classified the patients into two groups with significantly different OS. The multivariate and stratified analysis suggested that the prognostic value of the two-lncRNA signature was independent of other traditional clinical variables. Functional analysis suggested that these two lncRNA biomarkers might be mainly involved in transcription/translation-related or DNA repair-related biological processes. In summary, our results warrant further studies on these lncRNAs that will improve our understanding of the mechanisms associated with pathogenesis and progression of colon adenocarcinoma.

## INTRODUCTION

Colon cancer is the most common type of gastrointestinal cancer and remains the leading cause of cancer-related mortality worldwide [1]. Colon adenocarcinoma is the most common colon cancer type and accounts for 98% of newly diagnosed colon cancer cases. Surgery combined with other therapeutic options (including cryotherapy, radiofrequency ablation or chemotherapy) is the standard treatment strategy. Despite advances in diagnosis and treatment, the prognosis for patients with metastatic disease remains poor [2]. Hence,

the identification of more exact molecular biomarkers for identifying high-risk patient subgroup in survival is evidently needed and would enable clinicians to choose more suitable treatment strategies thus leading to improved clinical outcomes

The advent of full genome sequences and comprehensive analysis of functional elements have suggested that a large portion of the genome can be transcribed and led to the discovery of extensive transcription of large RNA transcripts termed long noncoding RNAs (lncRNAs) [3, 4]. lncRNAs are arbitrarily defined as ncRNA genes larger than 200 bp

which clearly distinguishes from small regulatory RNAs [5]. It is now well appreciated that lncRNAs exert a diverse spectrum of regulatory mechanisms in numerous biological processes at the transcriptional level, post-transcriptional level and epigenetic level [6, 7]. Like miRNAs and protein-coding genes, lncRNA also revealed differential expression in carcinogenesis compared to normal tissues, some of which have been identified as a tumor suppressor or oncogenes associated with cancer pathogenesis and development [8–11]. Furthermore, accumulating reports of aberrant lncRNA expression have suggested that lncRNAs may potentially serve as novel independent biomarkers for early diagnosis, prognosis and metastasis prediction in various cancer types [12–18]. Recently, several lncRNA profiling has been done in colorectal cancer and identified novel molecular subtypes and candidate diagnostic and prognostic biomarkers, such as *MALAT1*, *HOTAIR*, *RP11-462C24.1*, *PCAT-1* and so on [19–26]. However, research for lncRNA biomarkers in colon adenocarcinoma is presently in its infancy.

In the current study, our objective was to detect novel lncRNA biomarkers by analyzing lncRNA expression profiles and clinical data in a large cohort of patients with colon patients from The Cancer Genome Atlas (TCGA). Furthermore, we tried to identify a lncRNA-based expression signature to predict patient's clinical outcome. Finally, we performed bioinformatics analysis to infer the possible biological functions of lncRNA signature in colon adenocarcinoma.

## RESULTS

### Identification of prognostic lncRNAs in the training set

To detect the prognostic lncRNAs in colon adenocarcinoma patients, we first performed univariate Cox regression analyses to explore the association between expression levels of lncRNAs and the OS of the patients with colon adenocarcinoma, and identified 14 lncRNAs ( $p < 0.01$ ) that are significantly associated with OS in the training set (Supplementary Table 1). Then we performed multivariate Cox regression analysis for these 14 lncRNAs and found that two of 14 lncRNAs (*SNHG6* and *CTD-2354A18.1*) may be independent prognostic factors ( $p < 0.1$ ) (Table 1). Of them, we found that higher expression level of *SNHG6* was associated with good outcome and a higher expression level of *CTD-2354A18.1* was associated with poor outcome.

### Development of lncRNA expression signature for survival prediction in the training set

Selected two prognostic lncRNAs were fitted in a multivariate Cox regression analysis to obtain their relative

coefficient. Then a two-lncRNA expression signature was developed by constructing a mathematical formula using a linear combination of the expression values of two prognostic lncRNAs (*SNHG6* and *CTD-2354A18.1*) and the multivariate Cox regression coefficient as the weight as follows: lncRNA signature-based risk score =  $(-1.2023 \times \text{expression value of } SNHG6) + (1.106 \times \text{expression value of } CTD-2354A18.1)$ . Finally, each of the patients in the training set could get a risk score based on two-lncRNA expression signature and classified into high-risk group and low-risk group using the median risk score of the training set as the risk cutoff. As shown in Figure 1A, patients with low-risk score had a better OS than those with high-risk scores (log rank  $p < 0.001$ ) (Figure 1A). The area under the curve (AUC) of time-dependent ROC curves for the two-lncRNA expression signature was 0.881 at three years of OS (Figure 1B). The hazard ratios of high-risk group versus low-risk group for OS were 2.718 ( $p < 0.001$ ; 95% CI, 1.681–4.397) in the univariate analysis (Table 2). Distribution of the lncRNA risk score, the survival status of the patients and the expression pattern of two prognostic lncRNAs was also shown in Figure 1C. We found that patients in the high-risk group tended to express high level of *CTD-2354A18.1*, whereas patients in the low-risk group tended to express high level of *SNHG6* (Figure 1C).

### Further validation of lncRNA expression signature for survival prediction in the testing set and entire patient set

The two-lncRNA expression signature was then validated for its prognostic value in the testing set of 78 patients. By using the same lncRNA signature-based risk score formula, patients of the testing set were divided into the high-risk group ( $n = 33$ ) and the low-risk group ( $n = 45$ ) the median score of the training set as the cutoff value. In the consistent with the findings from the training set, patients in the high-risk group had significantly shorter median OS than those in the low-risk group (log rank  $p = 0.045$ ) (Figure 2A). The AUC for the two-lncRNA expression signature was 0.656 at three years of OS (Figure 1B). In the univariate analysis, the hazard ratios of high-risk group versus low-risk group for OS were 2.72 ( $p = 0.054$ ; 95% CI, 0.984–7.516) (Table 2). Distribution of the lncRNA risk score, the survival status of the patients and expression pattern of two prognostic lncRNAs was also shown in Figure 2C. We found that the expression pattern of two prognostic lncRNAs in patients with high-risk score or low-risk score is consistent with observations in the training set (Figure 2C).

We further validated the two-lncRNA expression signature in the entire patient set (combined training set and testing set). With the two-lncRNA expression signature, patients of the entire patient set were divided

**Table 1: Overall information of two prognostic lncRNAs associated with OS**

| Ensembl ID      | Gene name     | Genomic location                 | <i>p</i> value | HR    | Coefficient |
|-----------------|---------------|----------------------------------|----------------|-------|-------------|
| ENSG00000245910 | SNHG6         | Chr 8: 66,921,684–66,926,398 (-) | 0.008          | 0.398 | -0.921      |
| ENSG00000261780 | CTD-2354A18.1 | Chr 18: 73,324,941–73,349,878(+) | 0.008          | 2.227 | 0.8005      |

into a high-risk group ( $n = 72$ ) or a low-risk group ( $n = 85$ ) with significantly different OS (log rank  $p < 0.001$ ), which was similar to those observed in the training set and testing set (Figure 3A). The hazard ratios of high -risk group versus low-risk group for OS were 5.441 ( $p < 0.001$ ; 95% CI, 2.196–13.478) in the univariate analysis (Table 2). The AUC for the two-lncRNA expression signature was 0.723 at three years of OS (Figure 3B). Distribution of the lncRNA risk score, the survival status of the patients and the expression pattern of two prognostic lncRNAs were also shown in Figure 3C.

### Prognostic value of the lncRNA expression signature is independent of clinical variables

To examine whether the prognostic value of the lncRNA expression signature for survival prediction is independent of other clinical variables, we performed multivariate Cox regression analysis with age, gender, stage and lncRNA signature-based risk score as covariables in each of three patient sets. Results from multivariate Cox regression analysis suggested that the lncRNA expression signature, age and stage were

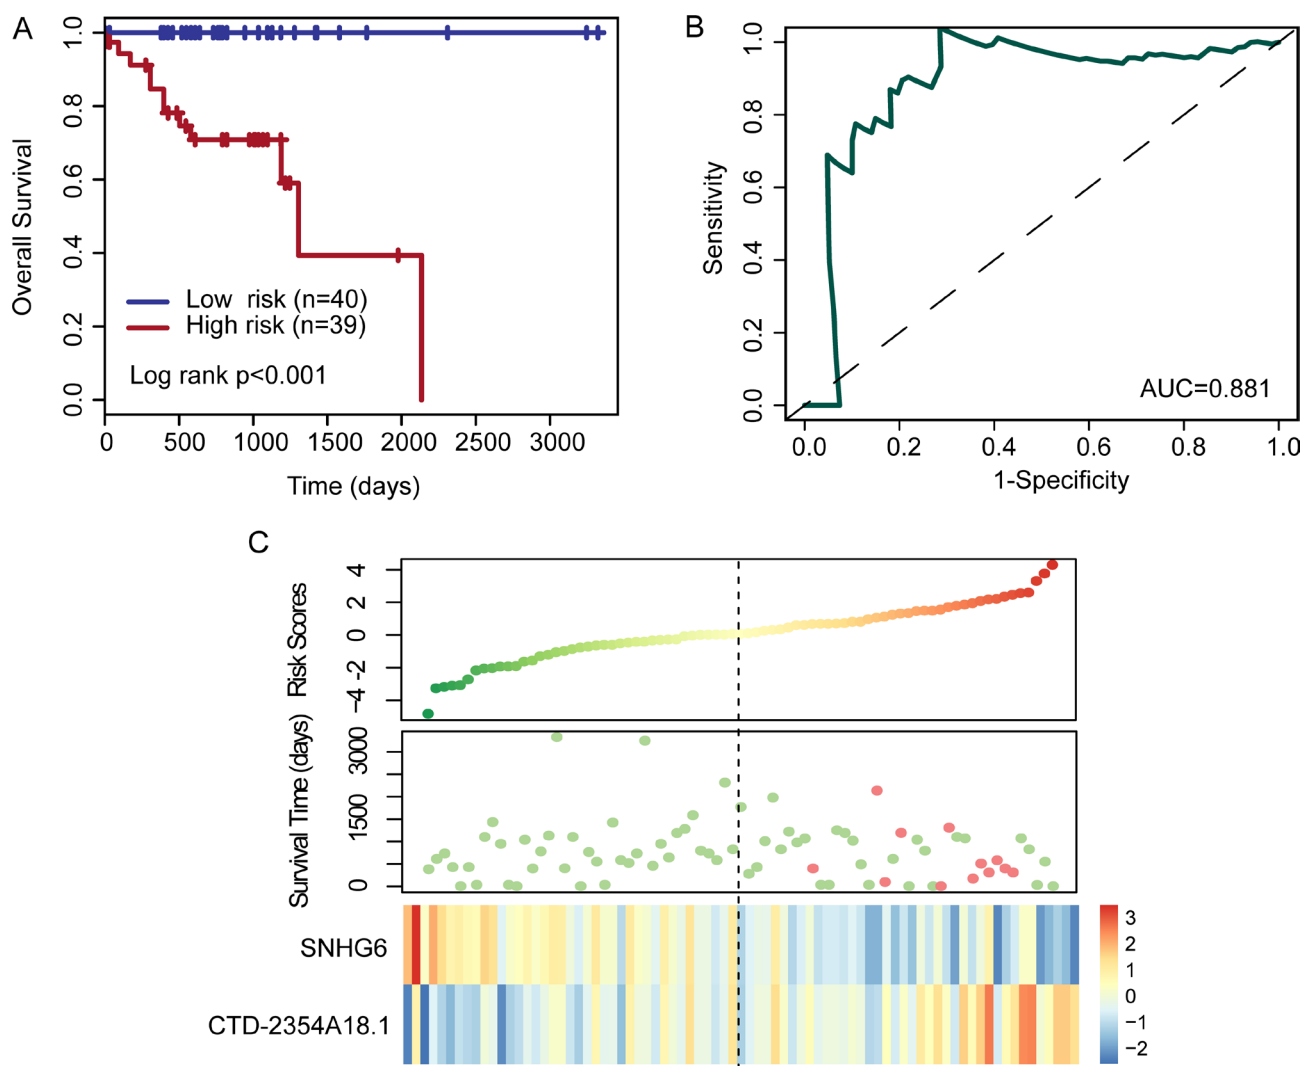

**Figure 1: Kaplan–Meier and ROC curves for the two-lncRNA signature in the training set.** (A) Kaplan–Meier curves for high- and low-risk groups obtained from the training set ( $n = 79$ ) divided by the median cutoff point. (B) Time-dependent ROC analysis for the two-lncRNA signature at three years of OS. (C) Risk score distribution, patients' survival status and expression heatmap of two lncRNA biomarkers.

**Table 2: Univariate and multivariate Cox regression analysis in each patient set**

| Variables                           | Univariate analysis |              |                | Multivariate analysis |              |                |
|-------------------------------------|---------------------|--------------|----------------|-----------------------|--------------|----------------|
|                                     | HR                  | 95% CI of HR | <i>p</i> value | HR                    | 95% CI of HR | <i>p</i> value |
| <b>Training set (n = 79)</b>        |                     |              |                |                       |              |                |
| Two-lncRNA risk score (High/Low)    | 2.718               | 1.681–4.397  | < 0.001        | 4.229                 | 1.835–9.748  | 0.001          |
| Age                                 | 1.093               | 1.019–1.173  | 0.013          | 1.111                 | 1.029–1.200  | 0.007          |
| Gender (Male/Female)                | 0.752               | 0.218–2.597  | 0.653          | 3.367                 | 0.737–15.390 | 0.117          |
| Stage (III,IV/I,II)                 | 1.945               | 0.624–6.061  | 0.252          | 6.746                 | 1.472–30.910 | 0.014          |
| <b>Testing set (n = 78)</b>         |                     |              |                |                       |              |                |
| Two-lncRNA risk score (High/Low)    | 2.720               | 0.984–7.516  | 0.054          | 2.762                 | 0.981–7.773  | 0.054          |
| Age                                 | 1.045               | 0.992–1.100  | 0.095          | 1.048                 | 1.002–1.097  | 0.042          |
| Gender (Male/Female)                | 0.667               | 0.240–1.859  | 0.439          | 0.418                 | 0.139–1.251  | 0.119          |
| Stage (III,IV/I,II)                 | 2.982               | 1.063–8.363  | 0.038          | 3.308                 | 1.151–9.508  | 0.026          |
| <b>Entire patient set (n = 157)</b> |                     |              |                |                       |              |                |
| Two-lncRNA risk score (High/Low)    | 5.441               | 2.196–13.478 | < 0.001        | 4.831                 | 1.947–11.988 | 0.001          |
| Age                                 | 1.063               | 1.021–1.107  | 0.003          | 1.062                 | 1.022–1.103  | 0.002          |
| Gender (Male/Female)                | 0.706               | 0.321–1.552  | 0.386          | 0.660                 | 0.299–1.456  | 0.303          |
| Stage (III,IV/I,II)                 | 2.398               | 1.131–5.082  | 0.023          | 2.539                 | 1.166–5.525  | 0.019          |

significantly correlated with OS of the patients with colon adenocarcinoma in all three patient sets (Table 2).

We next carried out a stratified analysis for age and stage to evaluate whether the lncRNA expression signature could predict OS of patients with the same age and stage features. All patients were stratified into a younger stratum (< 75) or an elder stratum. Results of survival analysis suggested that within each stratum, the two-lncRNA expression signature could further subdivide patients into the high-risk group and low-risk group with significantly different survival time (log rank  $p = 0.004$  for younger stratum and log rank  $p = 0.005$  for elder stratum) (Figure 4A and 4B). Then all patients were early-stage stratum (I/II) and advanced-stage stratum (III/IV). With the two-lncRNA expression signature, patients with early-stage were classified into the high-risk group ( $n = 42$ ) and low-risk group ( $n = 55$ ). The OS time of the high-risk group patients was significantly shorter than that of low-risk group patients (log rank  $p = 0.009$ ) (Figure 4C). Similar results were observed when patients with advanced-stage stratum were classified as high-risk ( $n = 30$ ) or low-risk ( $n = 30$ ) according to their two-lncRNA expression signature (log rank  $p = 0.006$ ) (Figure 4D).

### Functional enrichment analysis of genes correlated with the prognostic lncRNAs

To investigate the potential functional roles of identified prognostic lncRNAs, we first examined the expression correlation between prognostic lncRNAs and protein-coding genes (PCGs) for all patients and identified 327 PCGs positively or negatively co-expressed with prognostic lncRNAs (top 5%). Then we performed

functional enrichment analysis for 327 PCGs positively or negatively co-expressed with prognostic lncRNAs using DAVID web tool. Results of GO analysis suggested that these PCGs correlated with the prognostic lncRNAs were enriched in two functional clusters involved in transcription/translation-related or DNA repair-related biological processes (Table 3). KEGG functional enrichment analysis suggested that PCGs correlated with the prognostic lncRNAs were involved in five biological pathways, including Ribosome, Melanogenesis, Wnt signaling pathway, Glutamatergic synapse and Gastric acid secretion (Table 3). Moreover, 327 PCGs were found to be associated with INFECTION and CANCER disease classes through enrichment analysis in GAD\_DISEASE\_CLASS (Table 3).

### DISCUSSION

Colon cancer is a multifactorial disease with etiology encompassing genetic factors, environmental exposures and inflammatory conditions of the digestive tract. Although traditional prognostic and predictive factors for colorectal cancer such as age, tumor stage, surgical margins, number of affected local lymph nodes and tumor grade have produced significant improvements in patient clinical outcome [27], they reveals obvious limitations in distinguishing related cancer risk subgroup that have different clinical outcomes due to the molecular heterogeneity. Therefore, the prognostic potential of molecular markers has been systematically investigated in extensive clinical transcriptome research over the last decade. For example, a well-known gene signature, ColoPrint<sup>®</sup>, was developed to predict disease relapse in

patients with early-stage colorectal cancer [28]. Abdul *et al.* identified a 19-gene expression signature as a predictor of survival in colorectal cancer [29]. Another study reported prognostic signature comprising of 113 probe sets (termed CRC-113) to predict prognosis in patients with colorectal cancer [30].

With increasing knowledge in the field of ncRNA research, the development in the identification of molecular markers has been the shift in focus from protein-coding genes to ncRNAs [31, 32]. Some miRNA-based signatures were firstly identified in recent studies [33, 34]. Recently, lncRNAs have been discovered as a key

component of genome regulatory network and contribute to the hallmark of cancer [5, 35]. Accumulating evidence showed that lncRNA displays restricted tissue-specific and cancer-specific expression patterns distinguishing from miRNAs and protein-coding genes [8]. Moreover, tissue-specific and cancer-specific lncRNA expression was detectable and stable in body fluids, sputum and urine of cancer patients [8]. This specificity represents potentials of lncRNAs as superior biomarkers in cancer diagnosis and prognosis than miRNAs and protein-coding genes [36–39]. Several groups have initially investigated the prognostic value of lncRNA in colon cancers. Chen

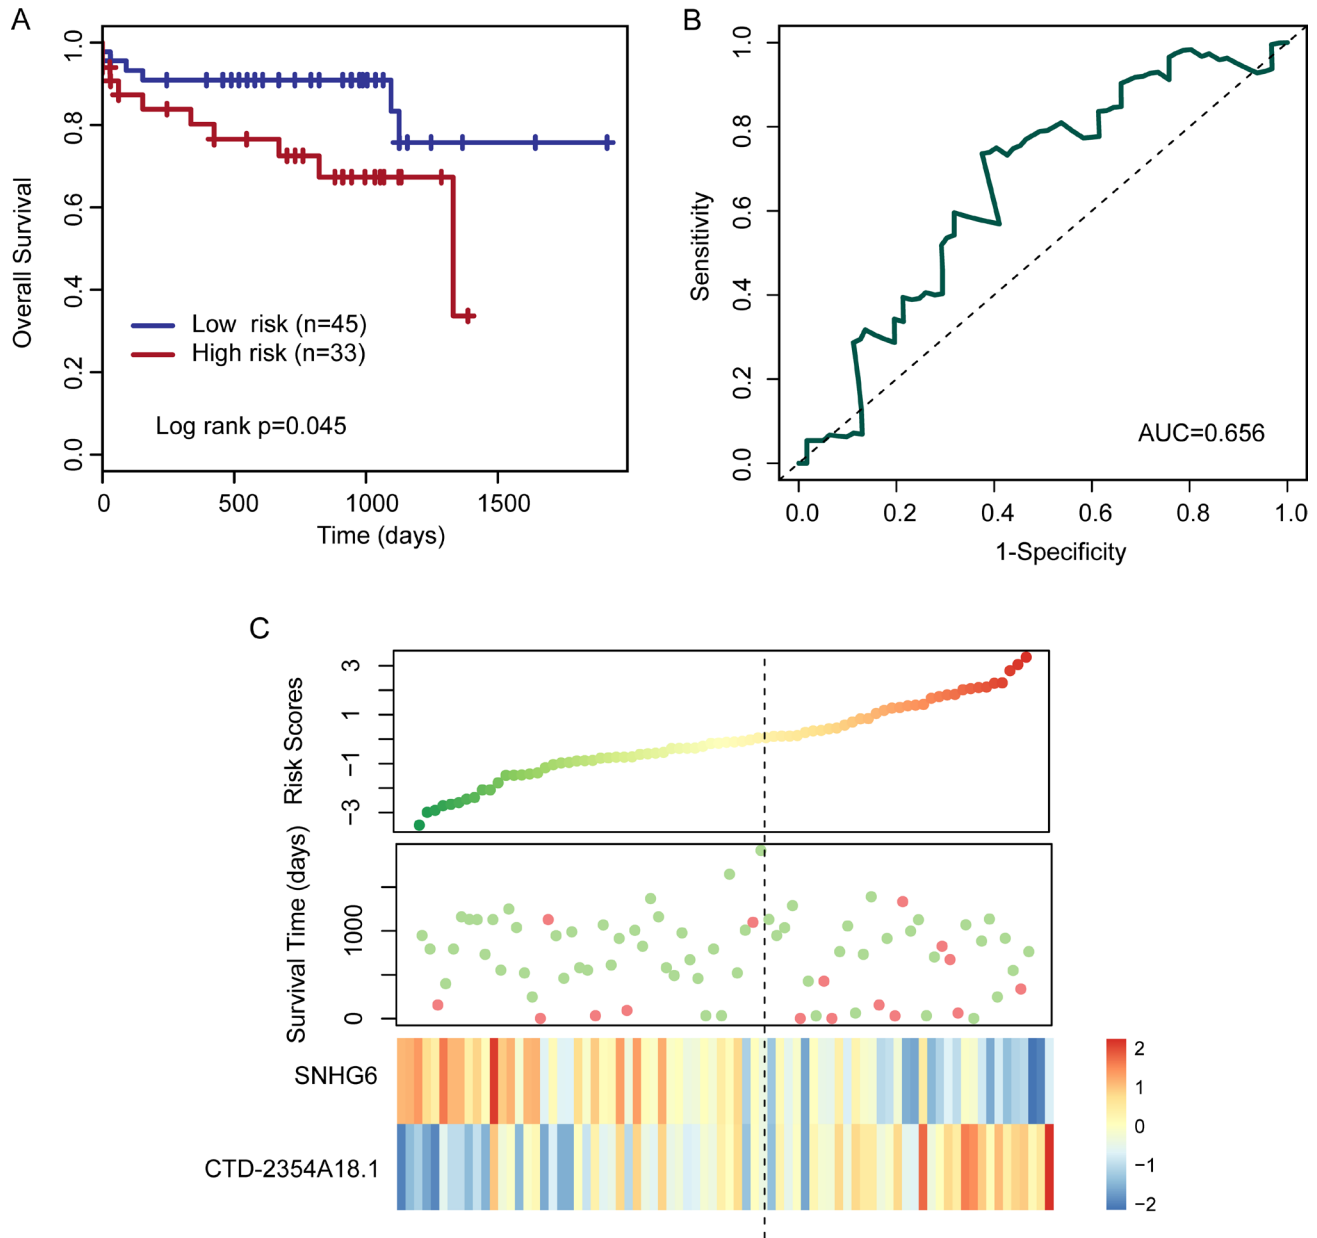

**Figure 2: Kaplan-Meier and ROC curves for the two-lncRNA signature in the testing set.** (A) Kaplan-Meier curves for high- and low-risk groups obtained from the testing set ( $n = 78$ ) divided by the median cutoff point. (B) Time-dependent ROC analysis for the two-lncRNA signature at three years of OS. (C) Risk score distribution, patients' survival status and expression heatmap of two lncRNA biomarkers.

**Table 3: Enriched functional category in GO, KEGG and disease**

| GO terms and KEGG pathways                                          | NO. of genes | p value |
|---------------------------------------------------------------------|--------------|---------|
| <b>Functional clusters of GO terms</b>                              |              |         |
| <b>Cluster 1 (Enrichment Score: 17.97)</b>                          |              |         |
| translational initiation                                            | 28           | 1.4E-21 |
| SRP-dependent cotranslational protein targeting to membrane         | 24           | 7.8E-21 |
| viral transcription                                                 | 25           | 3.2E-20 |
| nuclear-transcribed mRNA catabolic process, nonsense-mediated decay | 25           | 1.5E-19 |
| rRNA processing                                                     | 27           | 2.1E-15 |
| translation                                                         | 28           | 1.5E-14 |
| <b>Cluster 2 (Enrichment Score: 1.18)</b>                           |              |         |
| transcription-coupled nucleotide-excision repair                    | 6            | 7.7E-3  |
| nucleotide-excision repair, preincision complex assembly            | 3            | 8.3E-2  |
| DNA damage response, detection of DNA damage                        | 3            | 1.2E-1  |
| nucleotide-excision repair, DNA incision, 5'-to lesion              | 3            | 1.3E-1  |
| nucleotide-excision repair, DNA incision                            | 3            | 1.3E-1  |
| <b>KEGG pathway</b>                                                 |              |         |
| Ribosome                                                            | 26           | 1.3E-18 |
| Melanogenesis                                                       | 7            | 1.1E-2  |
| Wnt signaling pathway                                               | 8            | 1.4E-2  |
| Glutamatergic synapse                                               | 7            | 1.9E-2  |
| Gastric acid secretion                                              | 5            | 4.7E-2  |
| <b>GAD_DISEASE_CLASS</b>                                            |              |         |
| INFECTION                                                           | 51           | 2.3E-2  |
| CANCER                                                              | 67           | 2.9E-2  |

*et al.* used unsupervised consensus clustering method to identify five distinct molecular subtypes of CRC with different clinical outcome [19]. In one lncRNA profiling study based on GEO data, a lncRNA expression signature containing six lncRNA was first identified to improve prognosis prediction of colorectal cancer [40]. A recent study confirmed eight novel lncRNAs as associated with the progression of colon cancer [26]. However, it should be noted that there was little overlap between lncRNAs identified as biomarkers in colorectal cancer in previous studies, indicating that seeking lncRNA biomarkers of colorectal cancer is presently in its infancy and the further comprehensive investigation is necessary.

In this study, we performed integrative analysis for lncRNA expression profiles and clinical data in 157 patients with colon adenocarcinoma from TCGA to access the prognostic value of lncRNA expression for OS in patients with colon adenocarcinoma. We first subjected the lncRNA expression profiles of 79 patients in the training set to Cox proportional regression analysis for evaluating the relationship between lncRNA expression and clinical outcome, and identified two lncRNAs (*SNHG6* and *CTD-2354A18.1*) which could be considered as independent prognostic factors for predicting clinical outcome in colon

adenocarcinoma. More important, using a sample-splitting approach, a linear combination of these two lncRNA biomarkers (*SNHG6* and *CTD-2354A18.1*), termed two-lncRNA signature, was developed in the training set as a predictor for OS in patients with colon adenocarcinoma, and validated in the testing set and entire patient set. This two-lncRNA signature demonstrated significant prognostic performance in both the testing set and entire patient set which classified the patients into two groups with significantly different OS. Further analysis revealed that the prognostic value of the two-lncRNA signature was independent of other traditional clinical variables, such as age, gender, stage. Moreover, in the stratified analysis, the two-lncRNA signature showed prognostic value both in early-stage and advanced-stage patients, and both in younger and elder patients. These suggested that the two-lncRNA signature is an independent prognostic predictor in colon adenocarcinoma.

The two-lncRNA signature identified in this study included one lncRNAs (*SNHG6*) that was protective and another lncRNA (*CTD-2354A18.1*) that was risky with respect to their association between their expression and patients' survival. In the literature, lncRNA *SNHG6* has been reported to be differentially expressed in

hepatocellular carcinoma (HCC) and may be a potential biomarker for patients with HCC [41]. Yang's study found that *SNHG6* is overexpressed in gastric cancer tissues and cell lines measured by quantitative real-time polymerase chain reaction (qRT-PCR) and might serve as a candidate prognostic biomarker for gastric cancer patients [42]. Another lncRNA biomarker, *CTD-2354A18.1*, has also been shown to differentially expressed in gastric cancer tissue and normal tissue and may play a key role in the pathogenesis of gastric cancer [43]. However, the functional roles of these two lncRNA biomarkers in colon adenocarcinoma still remain to be explored. We infer potential functional roles of these two lncRNA biomarkers in colon adenocarcinoma performed by GO and KEGG pathway functional enrichment analysis, and found that these two lncRNA biomarkers may be mainly involved in transcription/translation-related or DNA repair-related biological processes, which is consistent with previous study [41].

In conclusion, our study identified a novel lncRNA expression signature comprising two lncRNAs (*SNHG6* and *CTD-2354A18.1*), which can be used as an independent prognostic marker of OS for patients with colon adenocarcinoma. More importantly, this lncRNA signature could provide additional prognostic information beyond clinicopathological factors. Our results warrant further studies on these lncRNAs that will improve our understanding of the mechanisms associated with pathogenesis and progression of colon adenocarcinoma.

## MATERIALS AND METHODS

### Patient dataset

Colon adenocarcinoma patients and corresponding clinical data used in this study were obtained from were obtained from The Cancer Genome Atlas (TCGA) data portal (<https://cancergenome.nih.gov/>). Then downloaded

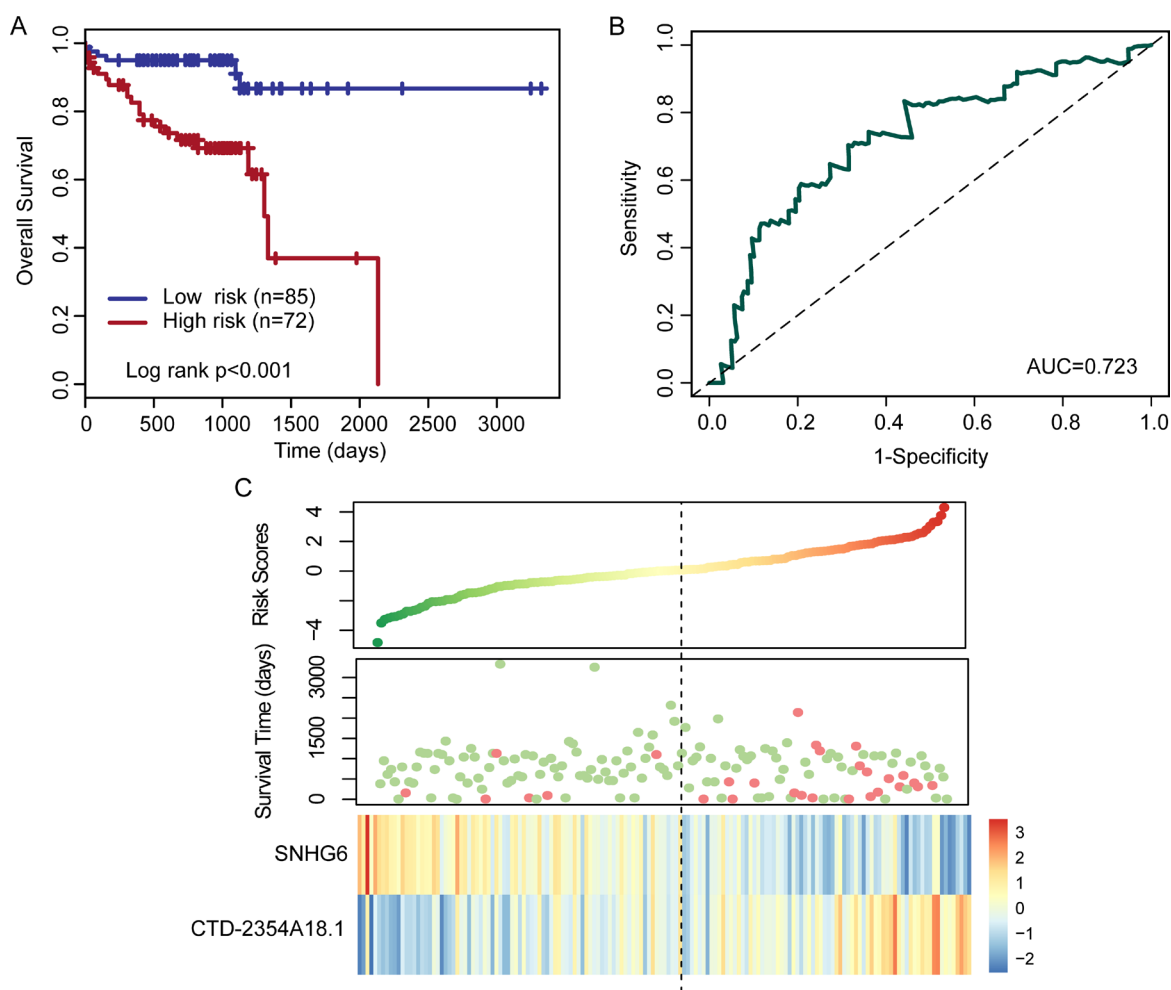

**Figure 3: Kaplan–Meier and ROC curves for the two-lncRNA signature in the entire patient set.** (A) Kaplan–Meier curves for high- and low-risk groups obtained from the entire patient set ( $n = 157$ ) divided by the median cutoff point. (B) Time-dependent ROC analysis for the two-lncRNA signature at three years of OS. (C) Risk score distribution, patients' survival status and expression heatmap of two lncRNA biomarkers.

clinical data were matched to the lncRNA expression profile. Therefore, some patients without clinical information or lncRNA expression profile were excluded. Finally, a total of 157 colon adenocarcinoma patients were retained for further analysis. In this study, 157 colon adenocarcinoma patients were randomly assigned to a training set ( $n = 79$ ) and a testing set ( $n = 78$ ). The training set was used to detect prognostic lncRNA. The detailed clinical characteristics of the colon adenocarcinoma patients are summarized in Table 4.

### LncRNA expression data procession

Expression levels of 12,727 lncRNA genes from 157 colon adenocarcinoma patients were downloaded from the TANRIC(The Atlas of ncRNA in Cancer, <http://bioinformatics.mdanderson.org/>) (version 1.0.6) which is an open-access resource for expression profiles

of lncRNAs in large patient cohorts of 20 cancer types including TCGA [44]. Briefly, 12,727 lncRNAs was obtained by examining the overlapping between lncRNA exons and any known coding genes based on the annotations of GENCODE and RefGene. Then, expression levels of 12,727 lncRNAs were quantified using reads per kilobase per million mapped reads (RPKM). Due to the very low expression level of lncRNAs Colon adenocarcinoma patients, we filtered out lncRNAs with expression value of 0 in more than 30% samples and obtained 1296 lncRNAs for further analysis. The expressive value of 1296 lncRNAs was log transformed using  $\log_2(\text{RPKM}+0.001)$  and z-score normalized.

### Statistical analysis

Univariate and multivariate Cox regression analysis was first performed to evaluate the association between

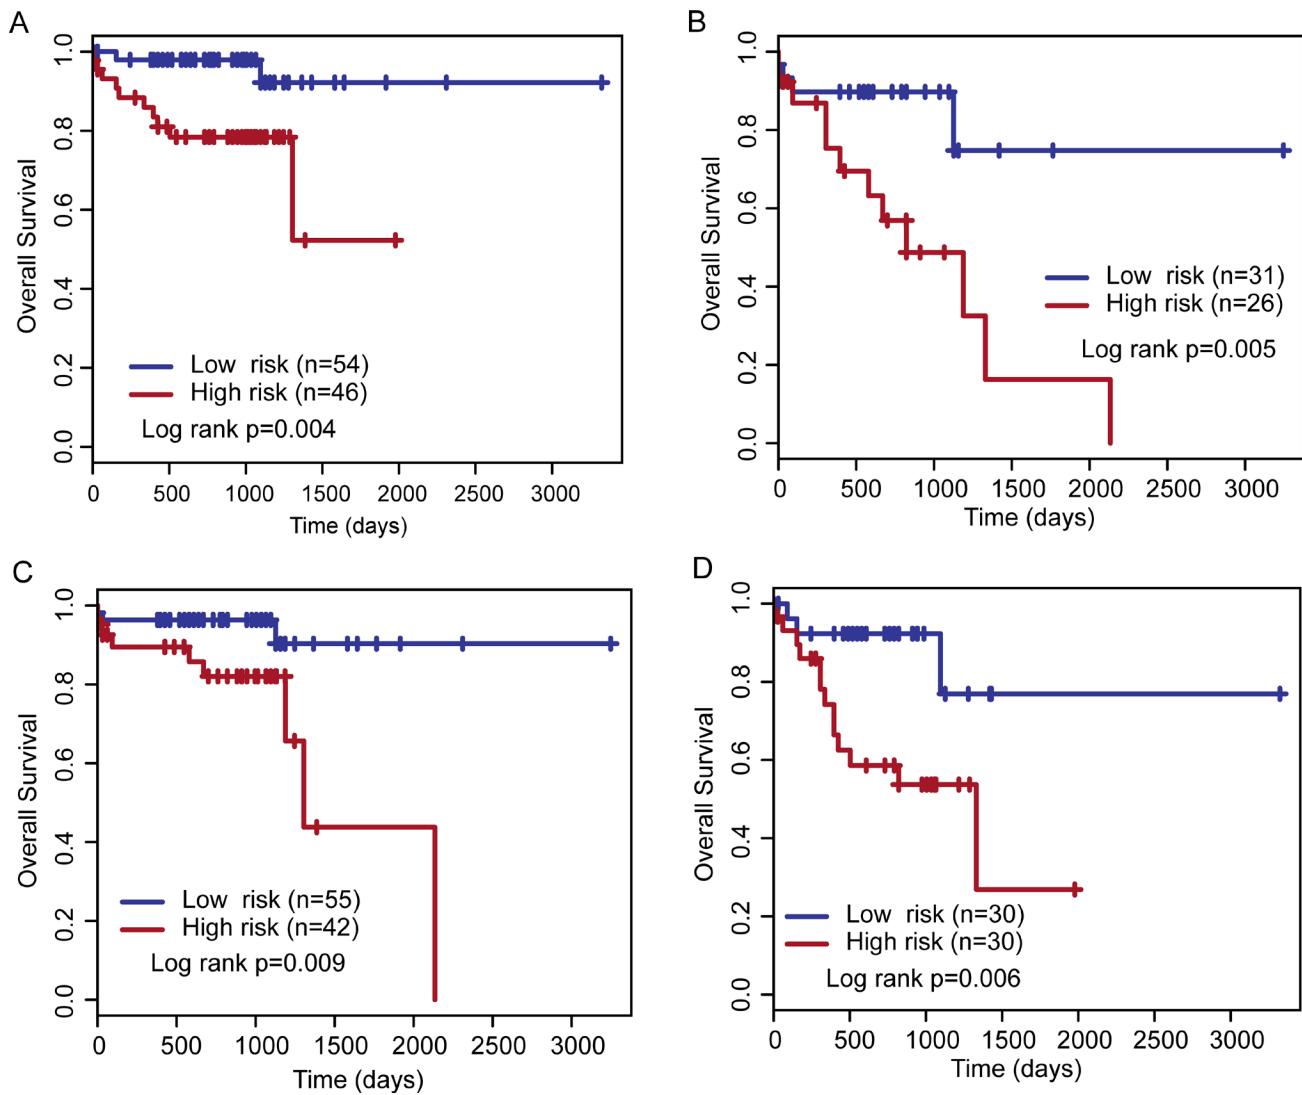

**Figure 4: Stratified analysis for age and stage.** The Kaplan–Meier curves for high- and low-risk groups obtained from younger patients (A), elder patients (B), early-stage patients (C) and advanced-stage patients (D).



**Table 4: Clinical characteristics of colon adenocarcinoma patients**

| Variables              |              | Training set (n = 79) | Testing set (n = 78) | Entire TCGA set (n = 157) |
|------------------------|--------------|-----------------------|----------------------|---------------------------|
| Survival status, n (%) | Alive        | 67                    | 62                   | 129                       |
|                        | Dead         | 12                    | 16                   | 28                        |
| Age, years, n (%)      | > 60         | 59                    | 62                   | 121                       |
|                        | <= 60        | 20                    | 16                   | 36                        |
| Gender, n (%)          | Female       | 45                    | 40                   | 85                        |
|                        | Male         | 34                    | 38                   | 72                        |
| Stage, n (%)           | Stage I/II   | 51                    | 46                   | 97                        |
|                        | Stage III/IV | 28                    | 32                   | 60                        |

the expression levels of lncRNAs and the OS of patients with colon adenocarcinoma and to identify prognostic lncRNAs. A lncRNA expression signature was constructed by a linear combination of the expression values of prognostic lncRNAs and the multivariate Cox regression coefficient as the weight. By using the median risk score as the cutoff point, patients can be classified into high-risk and low-risk groups. The Kaplan-Meier curves and log rank test were performed to assess survival differences between the low-risk and high-risk groups using the R package “survival”. Multivariate Cox regression analysis and data stratification analysis was performed to test whether the lncRNA expression signature was independent of clinical features. Time-dependent ROC curves were used to compare the sensitivity and specificity of the three-survival prediction based on the lncRNA expression signature using the R package “survivalROC” [45]. All analyses were performed using the R/BioConductor (version 3.0.2).

### Functional enrichment analysis

Functional enrichment analysis was performed for co-expressed protein-coding RNAs in GO, KEGG and GAD\_DISEASE\_CLASS using The Database for Annotation, Visualization and Integrated Discovery (DAVID) v6.8 (<https://david.ncifcrf.gov/>) [46].

### ACKNOWLEDGMENTS AND FUNDING

This work was supported by Heilongjiang Scientific Research Program Assignment (Grant No. 201705), Health and Family Planning Commission of Heilongjiang Province Scientific Program (Grant No. 2014–349 and 2017–112) and Harbin Medical University Innovative Scientific Research Grants Program (Grant No. 2016LCZX73).

### CONFLICTS OF INTEREST

The authors declare that they have no of interest.

### REFERENCES

1. Siegel RL, Miller KD, Jemal A. Cancer statistics, 2016. *CA Cancer J Clin.* 2016; 66:7–30.
2. Sanoff HK, Sargent DJ, Campbell ME, Morton RF, Fuchs CS, Ramanathan RK, Williamson SK, Findlay BP, Pitot HC, Goldberg RM. Five-year data and prognostic factor analysis of oxaliplatin and irinotecan combinations for advanced colorectal cancer: N9741. *J Clin Oncol.* 2008; 26:5721–5727.
3. Consortium EP. An integrated encyclopedia of DNA elements in the human genome. *Nature.* 2012; 489:57–74.
4. Derrien T, Johnson R, Bussotti G, Tanzer A, Djebali S, Tilgner H, Guernec G, Martin D, Merkel A, Knowles DG, Lagarde J, Veeravalli L, Ruan X, et al. The GENCODE v7 catalog of human long noncoding RNAs: analysis of their gene structure, evolution, and expression. *Genome research.* 2012; 22:1775–1789.
5. Rinn JL, Chang HY. Genome regulation by long noncoding RNAs. *Annu Rev Biochem.* 2012; 81:145–166.
6. Dykes IM, Emanuelli C. Transcriptional and Post-transcriptional Gene Regulation by Long Non-coding RNA. *Genomics Proteomics Bioinformatics.* 2017; 15:177–186.
7. Cao J. The functional role of long non-coding RNAs and epigenetics. *Biol Proced Online.* 2014; 16:11.
8. Prensner JR, Chinnaiyan AM. The emergence of lncRNAs in cancer biology. *Cancer Discov.* 2011; 1:391–407.
9. Gibb EA, Vucic EA, Enfield KS, Stewart GL, Lonergan KM, Kennett JY, Becker-Santos DD, MacAulay CE, Lam S, Brown CJ, Lam WL. Human cancer long non-coding RNA transcriptomes. *PLoS One.* 2011; 6:e25915.
10. Sun J, Shi H, Wang Z, Zhang C, Liu L, Wang L, He W, Hao D, Liu S, Zhou M. Inferring novel lncRNA-disease associations based on a random walk model of a lncRNA functional similarity network. *Mol Biosyst.* 2014; 10:2074–2081.
11. Zhou M, Wang X, Li J, Hao D, Wang Z, Shi H, Han L, Zhou H, Sun J. Prioritizing candidate disease-related long non-coding RNAs by walking on the heterogeneous lncRNA and disease network. *Mol Biosyst.* 2015; 11:760–769.

12. Zhou M, Guo M, He D, Wang X, Cui Y, Yang H, Hao D, Sun J. A potential signature of eight long non-coding RNAs predicts survival in patients with non-small cell lung cancer. *J Transl Med.* 2015; 13:231.
13. Li J, Chen Z, Tian L, Zhou C, He MY, Gao Y, Wang S, Zhou F, Shi S, Feng X, Sun N, Liu Z, Skogerboe G, et al. LncRNA profile study reveals a three-lncRNA signature associated with the survival of patients with oesophageal squamous cell carcinoma. *Gut.* 2014; 63:1700–1710.
14. Zhou M, Sun Y, Sun Y, Xu W, Zhang Z, Zhao H, Zhong Z, Sun J. Comprehensive analysis of lncRNA expression profiles reveals a novel lncRNA signature to discriminate nonequivalent outcomes in patients with ovarian cancer. *Oncotarget.* 2016; 7:32433–32448. <https://doi.org/10.18632/oncotarget.8653>.
15. Zhou M, Wang X, Shi H, Cheng L, Wang Z, Zhao H, Yang L, Sun J. Characterization of long non-coding RNA-associated ceRNA network to reveal potential prognostic lncRNA biomarkers in human ovarian cancer. *Oncotarget.* 2016; 7:12598–12611. <https://doi.org/10.18632/oncotarget.7181>.
16. Zhou M, Zhao H, Wang Z, Cheng L, Yang L, Shi H, Yang H, Sun J. Identification and validation of potential prognostic lncRNA biomarkers for predicting survival in patients with multiple myeloma. *J Exp Clin Cancer Res.* 2015; 34:102.
17. Zhou M, Xu W, Yue X, Zhao H, Wang Z, Shi H, Cheng L, Sun J. Relapse-related long non-coding RNA signature to improve prognosis prediction of lung adenocarcinoma. *Oncotarget.* 2016; 7:29720–29738. <https://doi.org/10.18632/oncotarget.8825>.
18. Sun J, Chen X, Wang Z, Guo M, Shi H, Wang X, Cheng L, Zhou M. A potential prognostic long non-coding RNA signature to predict metastasis-free survival of breast cancer patients. *Sci Rep.* 2015; 5:16553.
19. Chen H, Xu J, Hong J, Tang R, Zhang X, Fang JY. Long noncoding RNA profiles identify five distinct molecular subtypes of colorectal cancer with clinical relevance. *Mol Oncol.* 2014; 8:1393–1403.
20. Yang P, Xu ZP, Chen T, He ZY. Long noncoding RNA expression profile analysis of colorectal cancer and metastatic lymph node based on microarray data. *Oncotargets Ther.* 2016; 9:2465–2478.
21. Ye LC, Zhu X, Qiu JJ, Xu J, Wei Y. Involvement of long non-coding RNA in colorectal cancer: From benchtop to bedside (Review). *Oncol Lett.* 2015; 9:1039–1045.
22. Chen X, Liu B, Yang R, Guo Y, Li F, Wang L, Hu H. Integrated analysis of long non-coding RNAs in human colorectal cancer. *Oncotarget.* 2016; 7:23897–23908. <https://doi.org/10.18632/oncotarget.8192>.
23. Kong H, Wu Y, Zhu M, Zhai C, Qian J, Gao X, Wang S, Hou Y, Lu S, Zhu H. Long non-coding RNAs: novel prognostic biomarkers for liver metastases in patients with early stage colorectal cancer. *Oncotarget.* 2016; 7:50428–50436. <https://doi.org/10.18632/oncotarget.10416>.
24. Luo J, Qu J, Wu DK, Lu ZL, Sun YS, Qu Q. Long non-coding RNAs: a rising biotarget in colorectal cancer. *Oncotarget.* 2017; 8:22187–22202. <https://doi.org/10.18632/oncotarget.14728>.
25. Xie X, Tang B, Xiao YF, Xie R, Li BS, Dong H, Zhou JY, Yang SM. Long non-coding RNAs in colorectal cancer. *Oncotarget.* 2016; 7:5226–5239. <https://doi.org/10.18632/oncotarget.6446>.
26. Li J, Xue W, Lv J, Han P, Liu Y, Cui B. Identification of potential long non-coding RNA biomarkers associated with the progression of colon cancer. *Oncotarget.* 2017; 8:75834–75843. <https://doi.org/10.18632/oncotarget.17924>.
27. Burke HB. Outcome prediction and the future of the TNM staging system. *J Natl Cancer Inst.* 2004; 96:1408–1409.
28. Tan IB, Tan P. Genetics: an 18-gene signature (ColoPrint(R)) for colon cancer prognosis. *Nat Rev Clin Oncol.* 2011; 8:131–133.
29. Abdul Aziz NA, Mokhtar NM, Harun R, Mollah MM, Mohamed Rose I, Sagap I, Mohd Tamil A, Wan Ngah WZ, Jamal R. A 19-Gene expression signature as a predictor of survival in colorectal cancer. *BMC Med Genomics.* 2016; 9:58.
30. Nguyen MN, Choi TG, Nguyen DT, Kim JH, Jo YH, Shahid M, Akter S, Aryal SN, Yoo JY, Ahn YJ, Cho KM, Lee JS, Choe W, et al. CRC-113 gene expression signature for predicting prognosis in patients with colorectal cancer. *Oncotarget.* 2015; 6:31674–31692. <https://doi.org/10.18632/oncotarget.5183>.
31. Zhang F, Ren C, Lau KK, Zheng Z, Lu G, Yi Z, Zhao Y, Su F, Zhang S, Zhang B, Sobie EA, Zhang W, Walsh MJ. A network medicine approach to build a comprehensive atlas for the prognosis of human cancer. *Brief Bioinform.* 2016; 17:1044–1059.
32. Zhang F, Ren C, Zhao H, Yang L, Su F, Zhou MM, Han J, Sobie EA, Walsh MJ. Identification of novel prognostic indicators for triple-negative breast cancer patients through integrative analysis of cancer genomics data and protein interactome data. *Oncotarget.* 2016; 7:71620–71634. <https://doi.org/10.18632/oncotarget.12287>.
33. Zhu M, Huang Z, Zhu D, Zhou X, Shan X, Qi LW, Wu L, Cheng W, Zhu J, Zhang L, Zhang H, Chen Y, Zhu W, et al. A panel of microRNA signature in serum for colorectal cancer diagnosis. *Oncotarget.* 2017; 8:17081–17091. <https://doi.org/10.18632/oncotarget.15059>.
34. Zhang JX, Song W, Chen ZH, Wei JH, Liao YJ, Lei J, Hu M, Chen GZ, Liao B, Lu J, Zhao HW, Chen W, He YL, et al. Prognostic and predictive value of a microRNA signature in stage II colon cancer: a microRNA expression analysis. *Lancet Oncol.* 2013; 14:1295–1306.
35. Gutschner T, Diederichs S. The hallmarks of cancer: a long non-coding RNA point of view. *RNA Biol.* 2012; 9:703–719.
36. Gibb EA, Brown CJ, Lam WL. The functional role of long non-coding RNA in human carcinomas. *Mol Cancer.* 2011; 10:38.
37. Huarte M. The emerging role of lncRNAs in cancer. *Nat Med.* 2015; 21:1253–1261.

38. Zhou M, Zhao H, Xu W, Bao S, Cheng L, Sun J. Discovery and validation of immune-associated long non-coding RNA biomarkers associated with clinically molecular subtype and prognosis in diffuse large B cell lymphoma. *Mol Cancer*. 2017; 16:16.
39. Zhou M, Zhang Z, Zhao H, Bao S, Cheng L, Sun J. An Immune-Related Six-lncRNA Signature to Improve Prognosis Prediction of Glioblastoma Multiforme. *Mol Neurobiol*. 2017.
40. Hu Y, Chen HY, Yu CY, Xu J, Wang JL, Qian J, Zhang X, Fang JY. A long non-coding RNA signature to improve prognosis prediction of colorectal cancer. *Oncotarget*. 2014; 5:2230–2242. <https://doi.org/10.18632/oncotarget.1895>.
41. Birgani MT, Hajjari M, Shahrisa A, Khoshnevisan A, Shoja Z, Motahari P, Farhangi B. Long Non-Coding RNA SNHG6 as a Potential Biomarker for Hepatocellular Carcinoma. *Pathol Oncol Res*. 2017.
42. Yan K, Tian J, Shi W, Xia H, Zhu Y. LncRNA SNHG6 is Associated with Poor Prognosis of Gastric Cancer and Promotes Cell Proliferation and EMT through Epigenetically Silencing p27 and Sponging miR-101–3p. *Cell Physiol Biochem*. 2017; 42:999–1012.
43. Li DF, Yang MF, Shi SL, Du YL, Wang H, Zhou YL, Luo YL, Ren LL, Nie YQ. TM4SF5-CTD-2354A18.1-miR-4697–3P may play a key role in the pathogenesis of gastric cancer. *Bratisl Lek Listy*. 2015; 116:608–615.
44. Li J, Han L, Roebuck P, Diao L, Liu L, Yuan Y, Weinstein JN, Liang H. TANRIC: An Interactive Open Platform to Explore the Function of lncRNAs in Cancer. *Cancer Res*. 2015; 75:3728–3737.
45. Heagerty PJ, Lumley T, Pepe MS. Time-dependent ROC curves for censored survival data and a diagnostic marker. *Biometrics*. 2000; 56:337–344.
46. Huang da W, Sherman BT, Lempicki RA. Bioinformatics enrichment tools: paths toward the comprehensive functional analysis of large gene lists. *Nucleic Acids Res*. 2009; 37:1–13.
