# Supplementary material for: A long non-coding RNA expression signature to predict survival of patients with colon adenocarcinoma
Source: PubMed Central journal article supplement (PMC5731875; doi:10.18632/oncotarget.21064), 2017-09-19
Supplement: oncotarget-08-101298-s001.pdf [file oncotarget-08-101298-s001.pdf]

## A long non-coding RNA expression signature to predict survival of patients with colon adenocarcinoma

### SUPPLEMENTARY MATERIALS

**Supplementary Table 1: Overview of lncRNAs significantly associated with OS in the training set**

|                    | Coefficient | <i>p</i> -value | HR     | lower .95 | upper .95 |
|--------------------|-------------|-----------------|--------|-----------|-----------|
| ENSG00000174365.15 | -0.7337     | 0.0086          | 0.4801 | 0.2777    | 0.8301    |
| ENSG00000174403.11 | -0.9853     | 0.0022          | 0.3733 | 0.1985    | 0.7022    |
| ENSG00000177410.8  | -0.8053     | 0.002           | 0.4469 | 0.2679    | 0.7457    |
| ENSG00000177822.3  | 0.6529      | 0.0068          | 1.9211 | 1.1974    | 3.0821    |
| ENSG00000178947.8  | -0.9282     | 0.0092          | 0.3953 | 0.1966    | 0.7946    |
| ENSG00000227619.1  | -0.8302     | 0.0018          | 0.436  | 0.2591    | 0.7337    |
| ENSG00000229891.1  | -0.8406     | 0.0024          | 0.4315 | 0.2505    | 0.743     |
| ENSG00000230487.3  | -0.928      | 0.0041          | 0.3953 | 0.2096    | 0.7455    |
| ENSG00000233559.1  | -0.8295     | 0.0084          | 0.4363 | 0.2353    | 0.8088    |
| ENSG00000234390.4  | -0.7629     | 0.0055          | 0.4663 | 0.2722    | 0.7988    |
| ENSG00000245910.4  | -0.921      | 0.0077          | 0.3981 | 0.2022    | 0.7838    |
| ENSG00000255234.1  | 0.717       | 0.006           | 2.0483 | 1.2277    | 3.4172    |
| ENSG00000261780.2  | 0.8005      | 0.0077          | 2.2267 | 1.2361    | 4.011     |
| ENSG00000273213.1  | 1.1831      | 0.0084          | 3.2645 | 1.354     | 7.8711    |
